# Supplementary material for: Predictors of outcomes in adults with acute myeloid leukemia and KMT2A rearrangements
Source: PubMed Central journal article supplement (PMC8481264; doi:10.1038/s41408-021-00557-6), 2021-09-29
Supplement: 41408_2021_557_MOESM1_ESM.pdf [file 41408_2021_557_MOESM1_ESM.pdf]

Supplemental Figure 1: Patient selection.

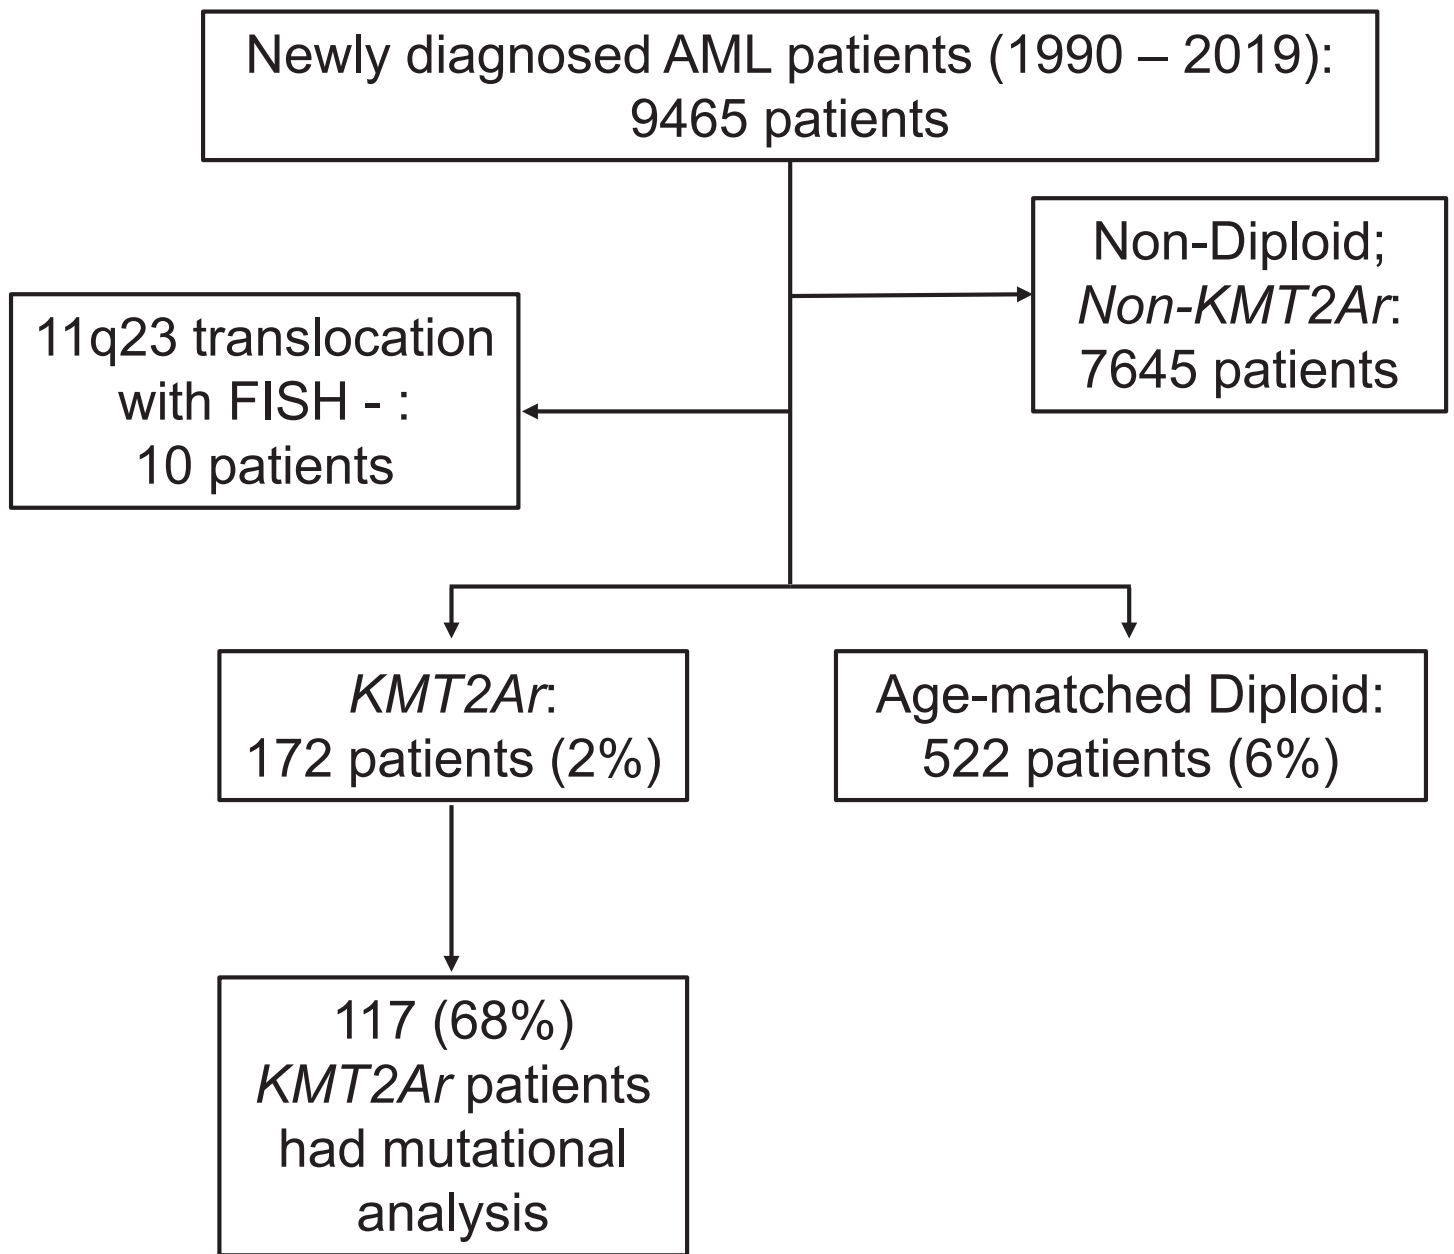



Supplemental Figure 3: Immunophenotype of *KMT2Ar* compared to diploid karyotype AML.

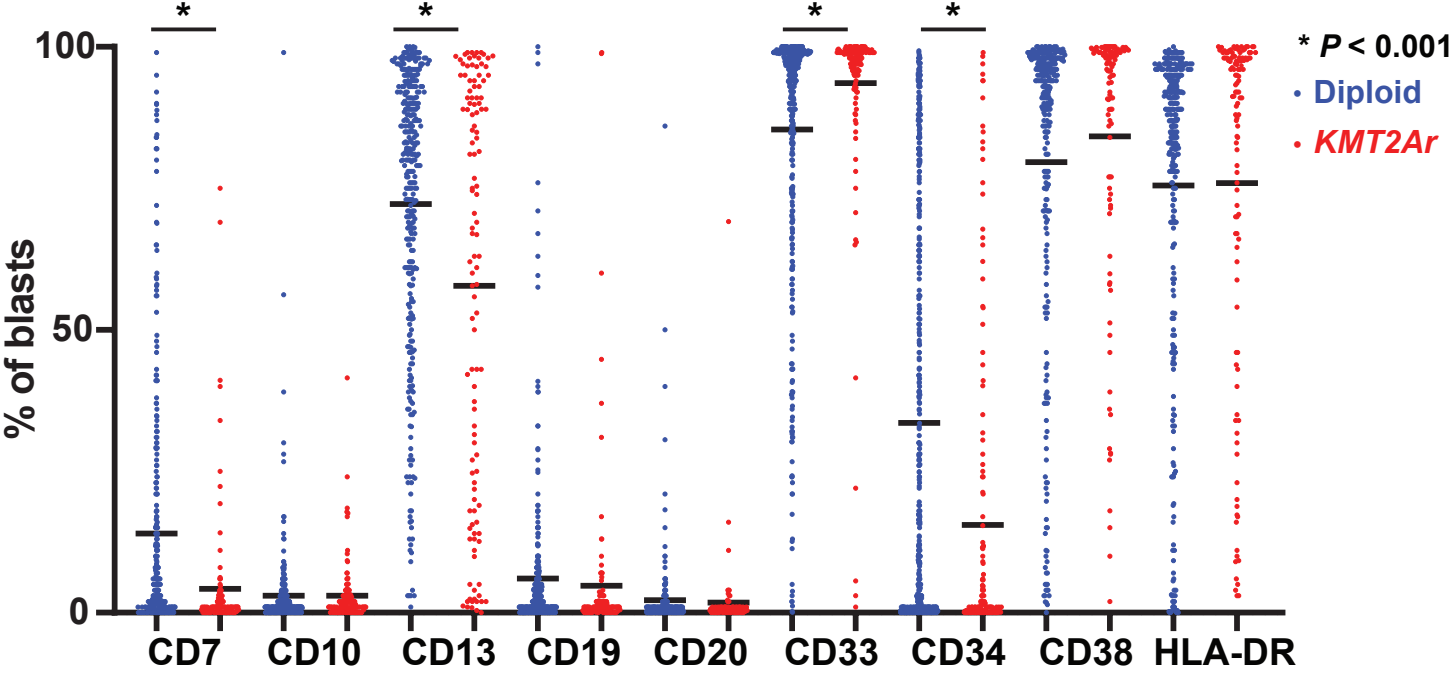

Supplemental Figure 4: Risk of relapse and overall survival of patients with t(9;11) AML.

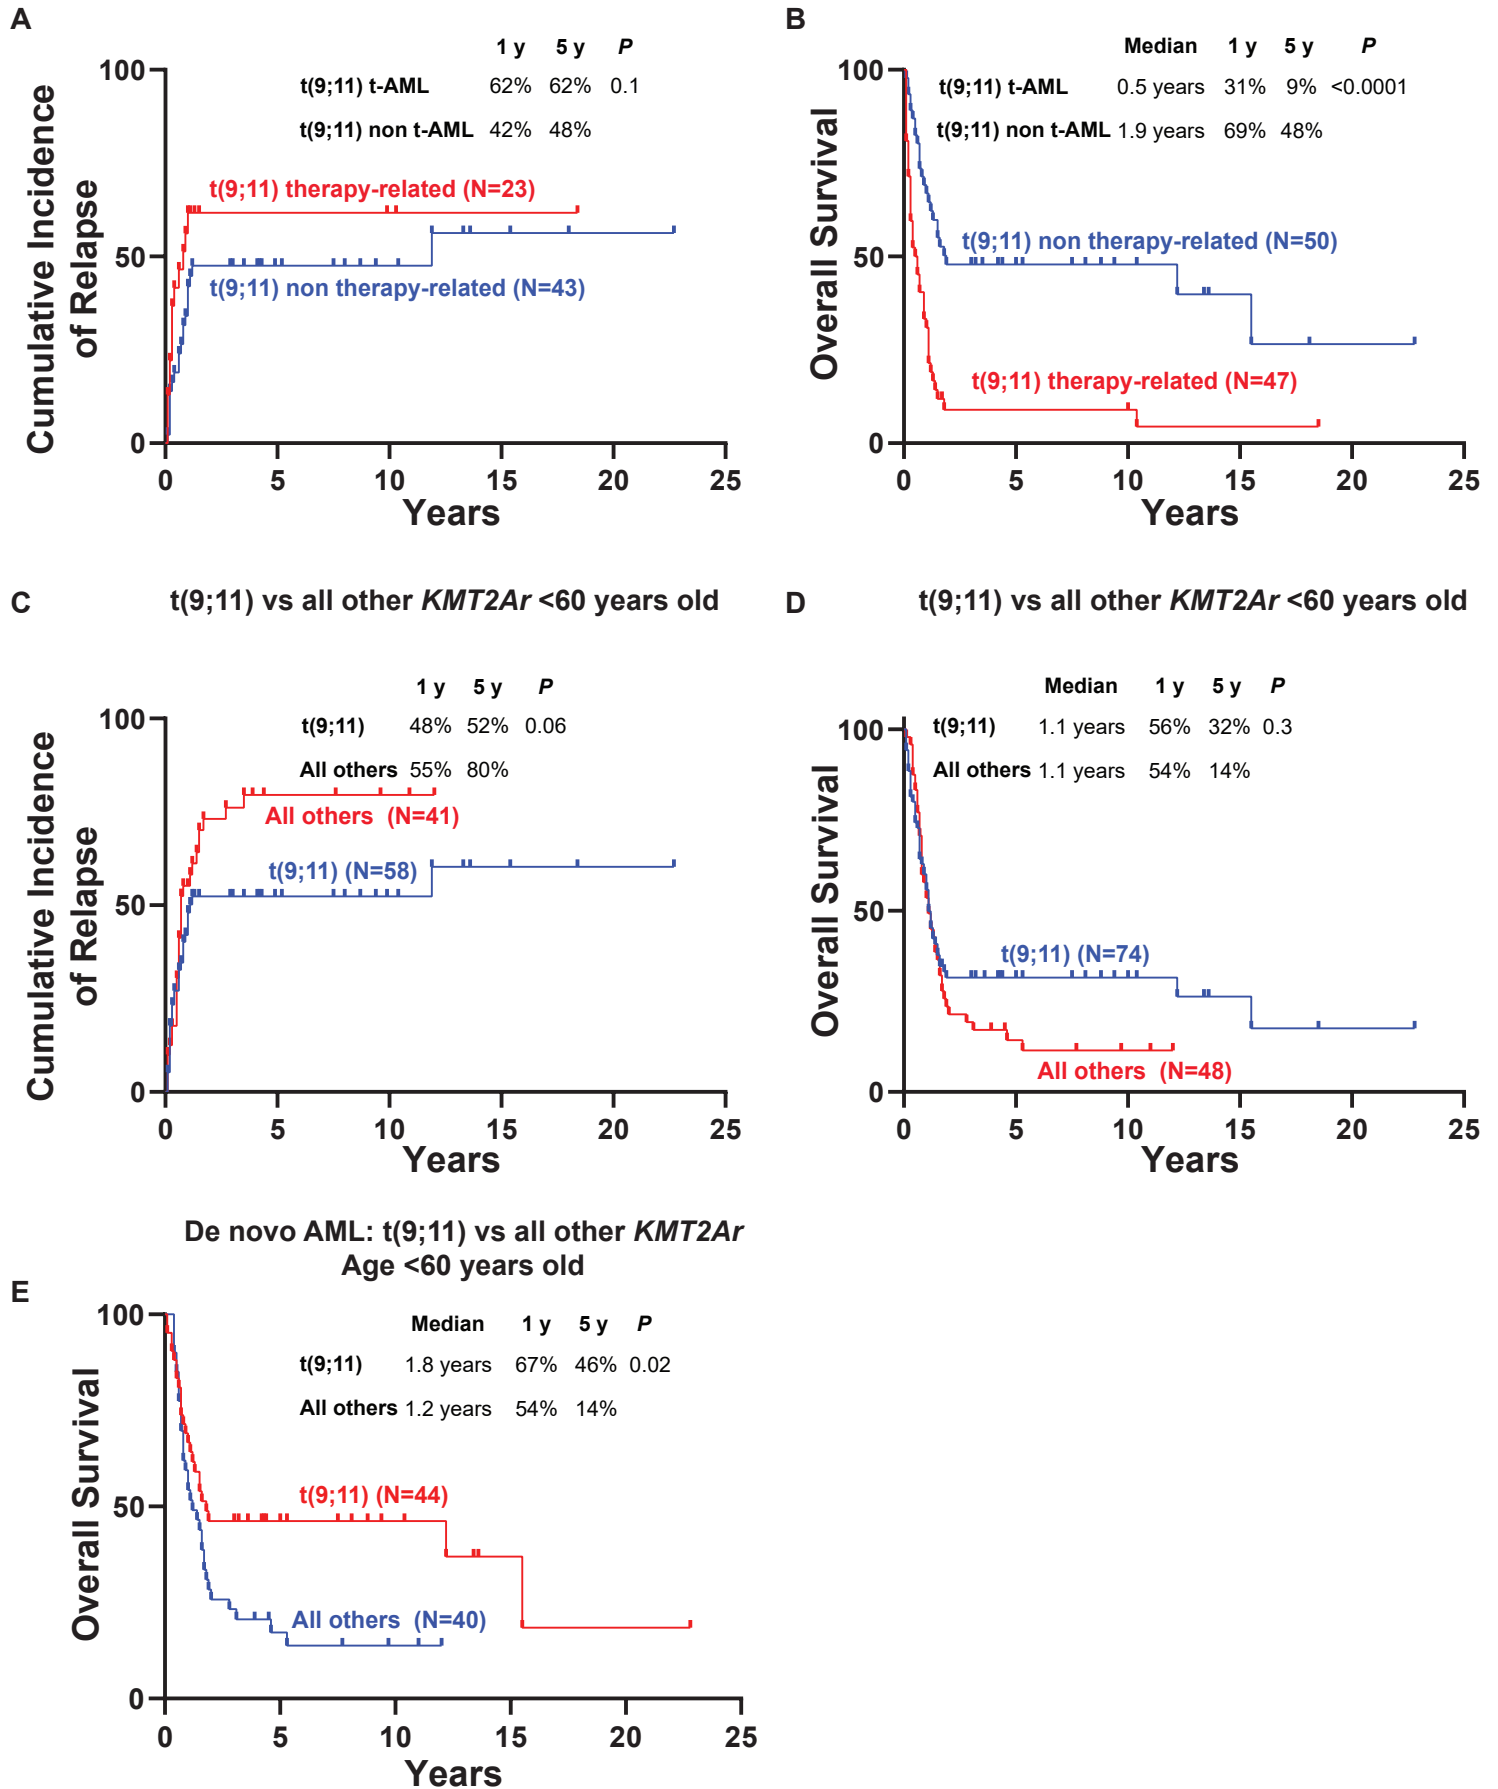

Supplemental Figure 5: Risk of relapse of patients with therapy related *KMT2Ar* AML.

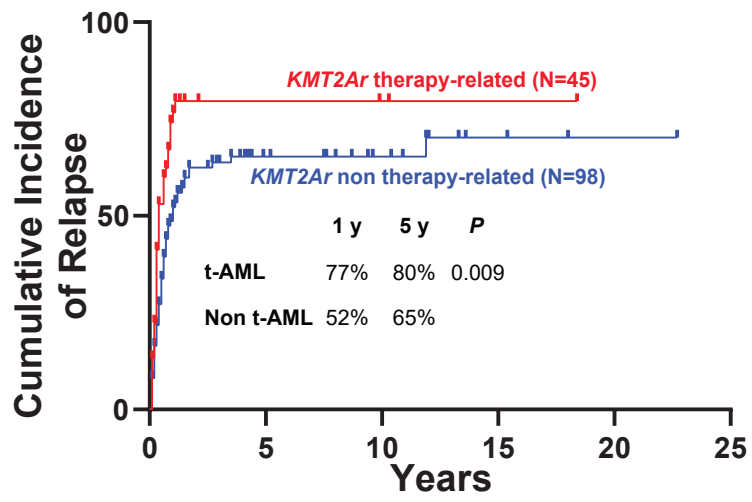

**Supplemental Figure 6: Risk of relapse and overall survival of *KMT2Ar* patients with and without additional chromosomal abnormalities (ACA).**

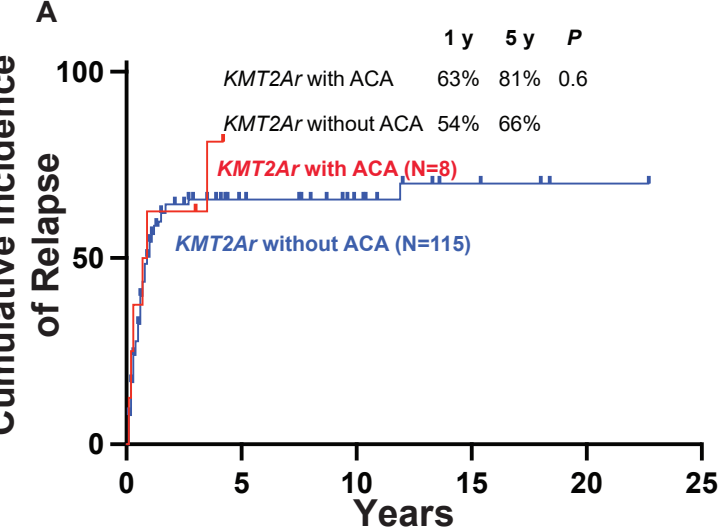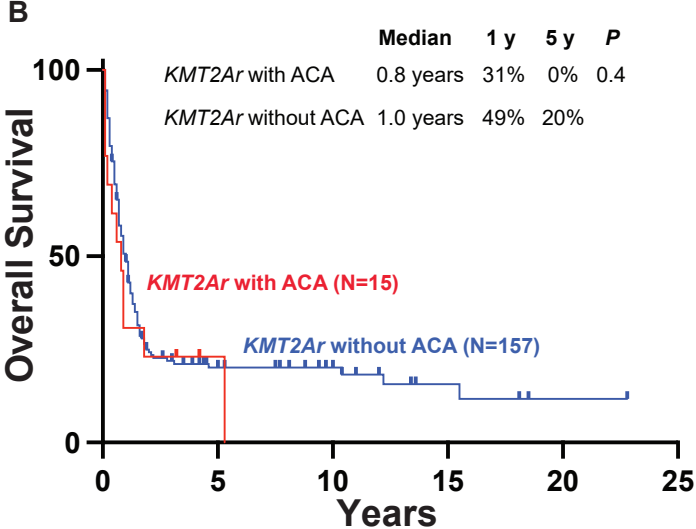

Supplemental Figure 7: Prognostic factors affecting overall survival in *KMT2Ar* AML patients.

**A**

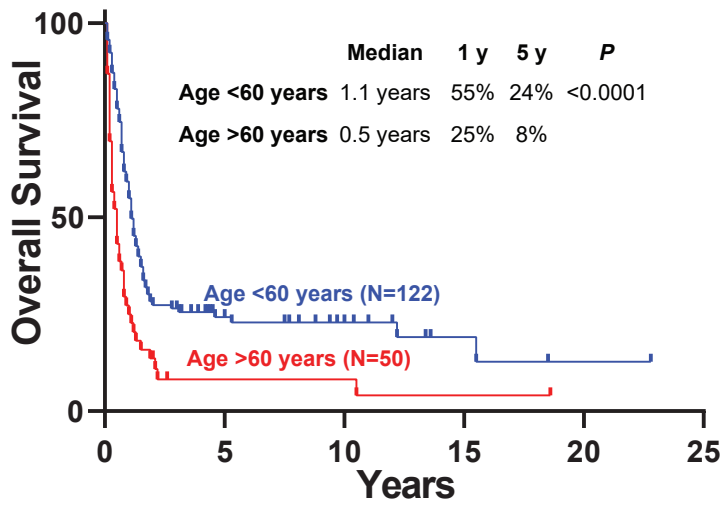

**B**

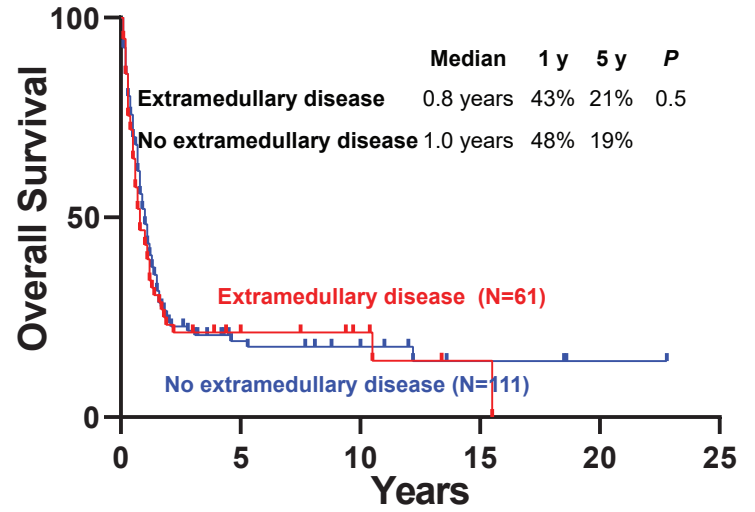

**C**

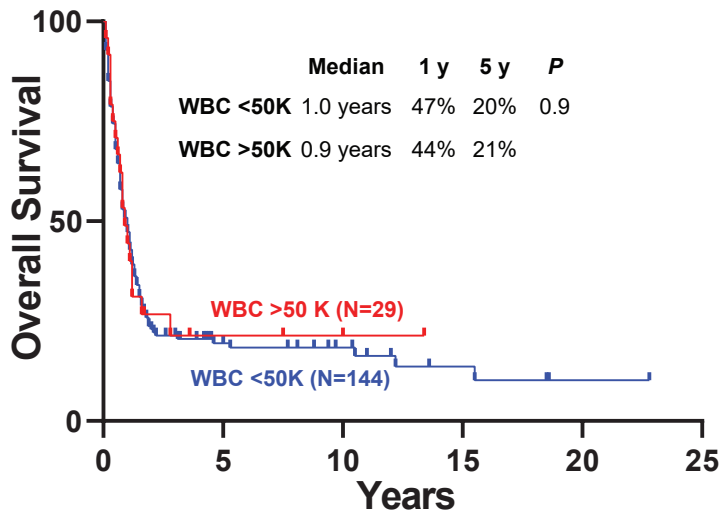

**D**

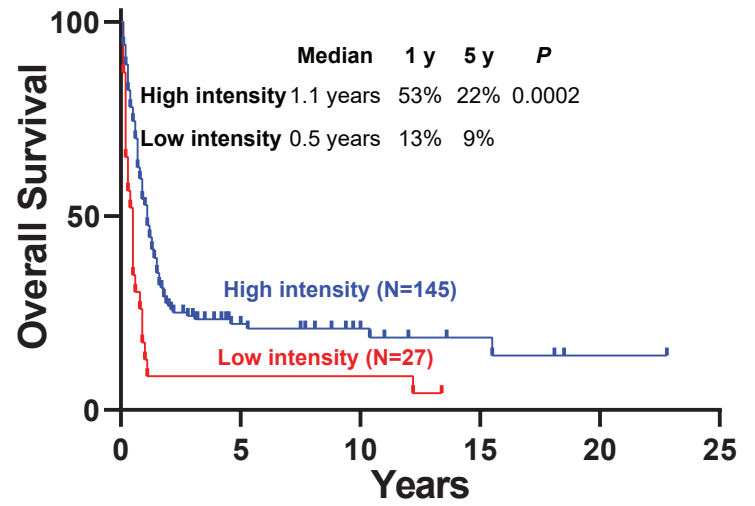

Supplemental Figure 8: Overall survival in *KMT2Ar* AML by mutational status.

A

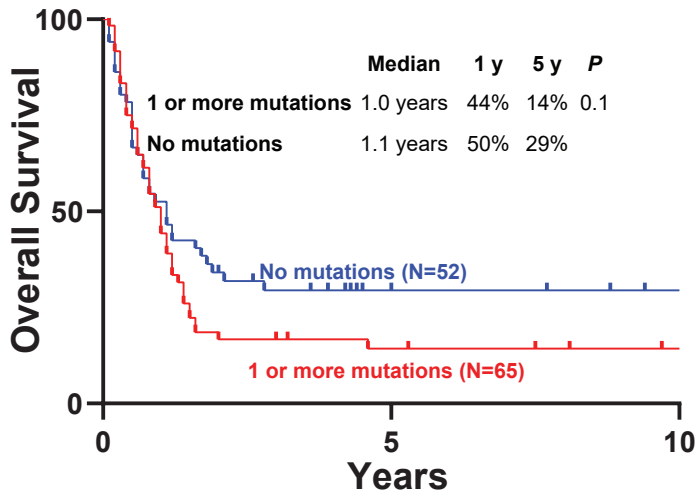

B

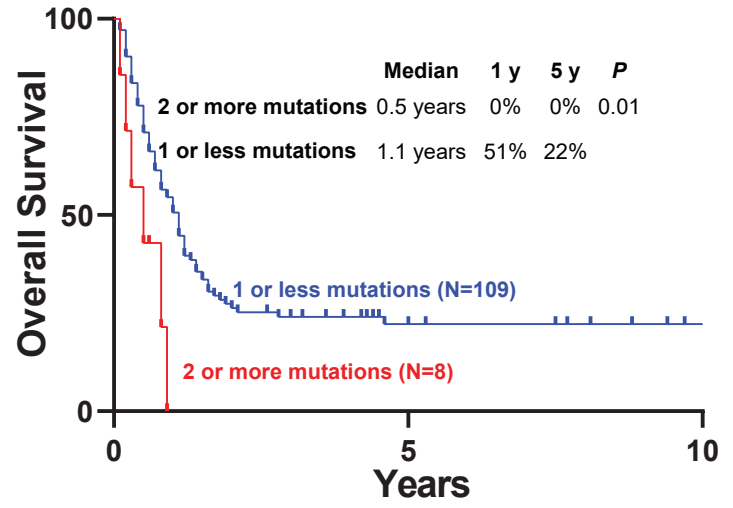

C

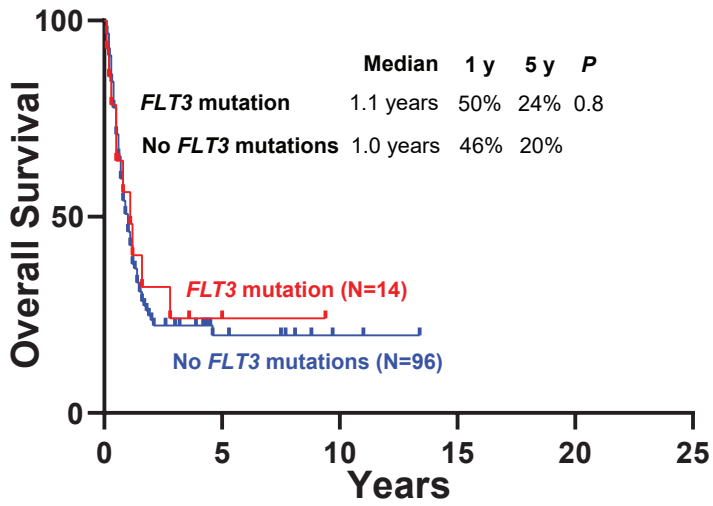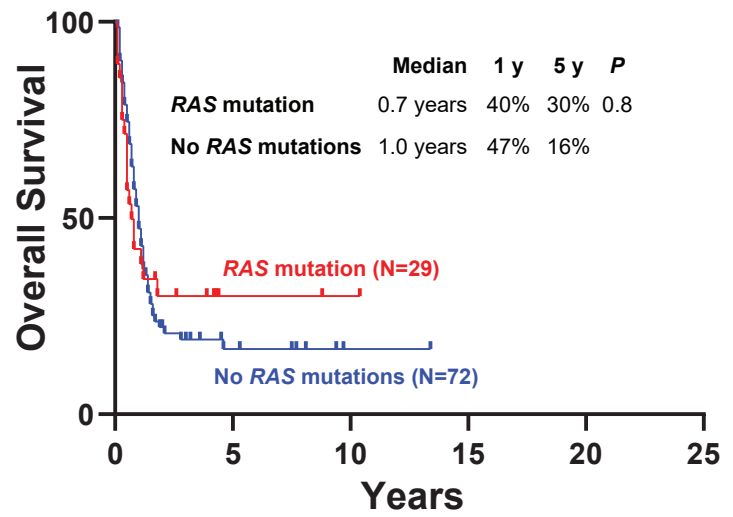



Supplemental Figure 9: Overall survival of adult patients with CNS disease in *KMT2Ar* AML.

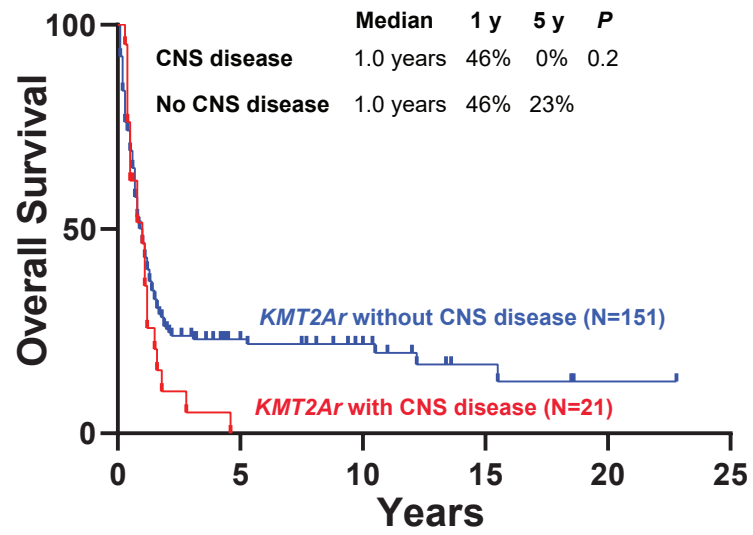

Supplemental Figure 10: Fusion gene partners in relapsed/refractory *KMT2Ar* AML cohort.

**A**

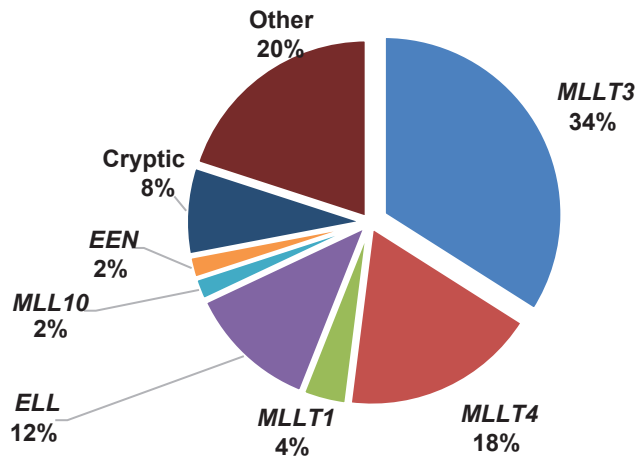

**B**

| Fusion              | Cytogenetics        | N (50)  |
|---------------------|---------------------|---------|
| <i>KMT2A-MLLT3</i>  | t(9;11) (p21;q23)   | 17 (34) |
| <i>KMT2A-MLLT4</i>  | t(6;11)(q27;q23)    | 9 (18)  |
| <i>KMT2A-ELL</i>    | t(11;19)(q23;p13.1) | 6 (12)  |
| <i>KMT2A-MLLT1</i>  | t(11;19)(q23;p13.3) | 2 (4)   |
| <i>KMT2A-EEN</i>    | t(11;19)(q23;p13)   | 1 (2)   |
| <i>KMT2A-MLLT10</i> | t(10;11)(p12;q23)   | 1 (2)   |
| Cryptic             |                     | 4 (8)   |
| Other               |                     | 10 (20) |

Values are N (%).

**Supplemental Table 1: Panels of 28, 53, or 81 genes.**

| Gene           | Exons (codons) tested on 81-gene panel                                                                                                                                                                                                      | Exons (codons) tested on 53-gene panel                                                                                                                                                                                                                            | Exons (codons) tested on 28-gene panel             |
|----------------|---------------------------------------------------------------------------------------------------------------------------------------------------------------------------------------------------------------------------------------------|-------------------------------------------------------------------------------------------------------------------------------------------------------------------------------------------------------------------------------------------------------------------|----------------------------------------------------|
| <i>ANKRD26</i> | (NM_014915) 1 (1-6)                                                                                                                                                                                                                         | (NM_007313): 4-6 (243-362), 7 (395-424)                                                                                                                                                                                                                           | (NM_005157): 1-11 (1-1004), 11 (1079-1150)         |
| <i>ABL1</i>    |                                                                                                                                                                                                                                             | (NM_007313): 4-6 (243-362), 7 (395-424)                                                                                                                                                                                                                           | (NM_005157): 1-11 (1-1004), 11 (1079-1150)         |
| <i>AKT1</i>    |                                                                                                                                                                                                                                             | (NM_005163): 3 (16-49)                                                                                                                                                                                                                                            |                                                    |
| <i>ALK</i>     |                                                                                                                                                                                                                                             | (NM_004304): 23 (1172-1175), 25 (1248-1275)                                                                                                                                                                                                                       |                                                    |
| <i>APC</i>     |                                                                                                                                                                                                                                             | (NM_000038): 16 (875-918), 16 (1113-1153), 16 (1257-1297), 16 (1288-1328), 16 (1318-1357), 16 (1349-1386), 16 (1377-1575)                                                                                                                                         |                                                    |
| <i>ASXL1</i>   | (NM_015338): 11-12 (362-1289), 12 (1299-1443), 12 (1450-1542)                                                                                                                                                                               |                                                                                                                                                                                                                                                                   | (NM_015338): 2-12 (20-1542)                        |
| <i>ASXL2</i>   | (NM_018263): 11-12 (381-1436)                                                                                                                                                                                                               |                                                                                                                                                                                                                                                                   |                                                    |
| <i>ATM</i>     |                                                                                                                                                                                                                                             | (NM_000051): 8 (353-355), 9 (409-412), 12 (601-633), 17 (846-880), 26 (1308-1331), 34 (1678-1719), 35 (1741-1773), 36 (1792-1832), 39 (1940-1973), 50 (2441-2479), 54 (2665-2670), 55 (2694-2717), 56 (2725-2756), 59 (2889-2891), 61 (2946-2950), 63 (3007-3051) |                                                    |
| <i>BRAF</i>    | (NM_004333) 11 (439-478), 15 (581-620)                                                                                                                                                                                                      | (NM_004333): 11 (439-471), 15 (581-606)                                                                                                                                                                                                                           | (NM_004333): 1 (1-23), 1-18 (34-717), 18 (725-767) |
| <i>BCOR</i>    | (NM_017745): 2-3 (1-55), 4 (642-999), 4 (514-635), 4 (460-510), 4 (56-321), 4 (331-454), 5-6 (1000-1080), 7 (1137-1138), 8 (1168-1206), 8(1212-1249), 9 (1275-1340), 9-10 (1354-1366), 10-12 (1401-1547), 13-15 (1556-1640), 15 (1663-1722) |                                                                                                                                                                                                                                                                   |                                                    |
| <i>BCORL1</i>  | (NM_021946) 1-3 (1-113), 3 (123-609), 3 (613-808), 3 (832-850), 3-4 (862-1203), 5-6 (1205-1261), 6 (1292-1323), 6-7 (1326-1378), 7(1382-1428), 7-8 (1431-1484), 9-11 (1491-1600), 11-12 (1606-1684), 12 (1687-1699), 12 (1707-1712)         |                                                                                                                                                                                                                                                                   |                                                    |
| <i>BRINP3</i>  | (NM_199051) 2-8 (1-767)                                                                                                                                                                                                                     |                                                                                                                                                                                                                                                                   |                                                    |
| <i>CDH1</i>    |                                                                                                                                                                                                                                             | (NM_004360): 3 (77-117), 8 (369-379), 9 (399-439)                                                                                                                                                                                                                 |                                                    |
| <i>CALR</i>    | (NM_004343) 9 (352-359), 9 (364-410), 9 (417)                                                                                                                                                                                               |                                                                                                                                                                                                                                                                   |                                                    |
| <i>CSF1R</i>   |                                                                                                                                                                                                                                             | (NM_005211): 7 (297-301), 22 (926-970)                                                                                                                                                                                                                            |                                                    |
| <i>CSF3R</i>   | (NM_156039) 14 (575-622), 17 (681-800), 17 (822-864)                                                                                                                                                                                        |                                                                                                                                                                                                                                                                   |                                                    |
| <i>CBL</i>     | (NM_005188) 7-9 (336-477)                                                                                                                                                                                                                   |                                                                                                                                                                                                                                                                   |                                                    |
| <i>CBLB</i>    | (NM_170662) 7-9 (282-397), 10 (402-469)                                                                                                                                                                                                     |                                                                                                                                                                                                                                                                   |                                                    |
| <i>CBLC</i>    | (NM_012116) 7-9 (336-454), 10 (466-475)                                                                                                                                                                                                     |                                                                                                                                                                                                                                                                   |                                                    |

|               |                                                                                                                                                                                              |                                                                                                                      |                                                                                                               |
|---------------|----------------------------------------------------------------------------------------------------------------------------------------------------------------------------------------------|----------------------------------------------------------------------------------------------------------------------|---------------------------------------------------------------------------------------------------------------|
| <i>CEBPA</i>  | (NM_004364) 1 (1-70), 1 (249-358), 1 (146-175), 1 (178-201)                                                                                                                                  |                                                                                                                      |                                                                                                               |
| <i>CTNNB1</i> |                                                                                                                                                                                              | (NM_001904): 3 (12-50)                                                                                               |                                                                                                               |
| <i>CREBBP</i> | (NM_004380) 1 (1-26), 2-7 (29-559), 8 (561-608), 9-11 (615-720), 12-14 (722-837), 14-30 (840-1724), 31 (2238-2443), 31 (2051-2235), 31(2049), 31 (2011-2037), 31 (1725-1931), 31 (1967-1995) |                                                                                                                      |                                                                                                               |
| <i>CUX1</i>   | (NM_181552) 2-6 (11-172), 6-9 (174-241), 10-13 (248-375), 14 (379-408)                                                                                                                       |                                                                                                                      |                                                                                                               |
| <i>CRLF2</i>  | (NM_022148.2) exon 6 (codons 217-256)                                                                                                                                                        |                                                                                                                      |                                                                                                               |
| <i>DNMT3A</i> | (NM_022552) 8-22 (286-862), 23 (866-913)                                                                                                                                                     | (NM_022552): 23 (866-913)                                                                                            | (NM_022552): 2-23 (1-913)                                                                                     |
| <i>DDX41</i>  | (NM_016222) 1-11 (1-410), 12-14 (420-517), 15 (522-541), 16-17 (546-623)                                                                                                                     |                                                                                                                      |                                                                                                               |
| <i>EED</i>    | (NM_003797) 1-2 (1-69), 2-8 (71-287), 9-12 (289-442)                                                                                                                                         |                                                                                                                      |                                                                                                               |
| <i>ELANE</i>  | (NM_001972) 1-2 (5-46), 2 (69-75), 4-5 (123-268)                                                                                                                                             |                                                                                                                      |                                                                                                               |
| <i>ETNK1</i>  | (NM_018638) 3 (228-275)                                                                                                                                                                      |                                                                                                                      |                                                                                                               |
| <i>ETV6</i>   | (NM_001987) 1-6 (1-378), 7-8 (385-453)                                                                                                                                                       |                                                                                                                      |                                                                                                               |
| <i>EGFR</i>   |                                                                                                                                                                                              | (NM_005228): 3 (108-142), 7 (288-297), 15 (598-627), 18-20 (708-817), 21 (857-875)                                   | (NM_005228): 1 (1-24), 2-20 (30-786), 20-23 (792-927), 23-26 (935-1043), 26-27 (1047-1061), 27-28 (1067-1211) |
| <i>ERBB2</i>  |                                                                                                                                                                                              | (NM_004448): 19 (754-769), 20 (772-818), 21 (839-883)                                                                |                                                                                                               |
| <i>ERBB4</i>  |                                                                                                                                                                                              | (NM_005235): 3 (98-140), 4 (153-186), 6 (208-244), 7 (248-287), 8 (295-306), 9 (333-350), 15 (579-619), 23 (907-936) |                                                                                                               |
| <i>EZH2</i>   | (NM_004456) 2-5 (1-158), 5-6 (160-205), 7 (209-217), 8-19 (243-732), 20 (752)                                                                                                                | (NM_004456): 16 (618-649)                                                                                            | (NM_004456): 2-5 (3-162), 6-7 (171-217), 8-20 (243-752)                                                       |
| <i>FBXW7</i>  | (NM_033632) 9-12 (413-708)                                                                                                                                                                   | (NM_033632): 5 (243-278), 8 (375-394), 9 (429-471), 10 (473-508), 11 (549-583)                                       |                                                                                                               |
| <i>FGFR1</i>  |                                                                                                                                                                                              | (NM_015850): 4 (120-126)                                                                                             |                                                                                                               |
| <i>FGFR2</i>  |                                                                                                                                                                                              | (NM_000141): 7 (250-311), 7 (302-313), 9 (362-382), 12 (521-550)                                                     |                                                                                                               |
| <i>FGFR3</i>  |                                                                                                                                                                                              | (NM_000142): 7 (247-288), 9 (379-422), 14-15 (639-659), 18 (792-807)                                                 |                                                                                                               |
| <i>FLT3</i>   | (NM_004119) 11-20 (437-847)                                                                                                                                                                  | (NM_004119): 11 (437-456), 14 (569-605), 16 (648-683), 20 (807-843)                                                  | (NM_004119): 2-24 (15-994)                                                                                    |
| <i>GATA1</i>  | (NM_002049) 2-3 (1-84)                                                                                                                                                                       |                                                                                                                      | (NM_002049): 2-5 (1-287), 6 (291-405), 6 (407-414)                                                            |
| <i>GATA2</i>  | (NM_032638) 2-5 (22-377), 5-6 (379-481)                                                                                                                                                      |                                                                                                                      | (NM_032638): 2-6 (1-481)                                                                                      |
| <i>GFI1</i>   | (NM_005263) 2 (2-39)                                                                                                                                                                         |                                                                                                                      |                                                                                                               |
| <i>GNA11</i>  |                                                                                                                                                                                              | (NM_002067): 4-5 (172-216), 6 (255-297)                                                                              |                                                                                                               |
| <i>GNAQ</i>   |                                                                                                                                                                                              | (NM_002072): 4-5 (159-245), 5-6 (241-297), 6-7 (291-360), 7 (355-360)                                                |                                                                                                               |
| <i>GNAS</i>   | (NM_000516) 8 (200-202), 11 (315-324)                                                                                                                                                        | (NM_000516): 8 (200-220)                                                                                             |                                                                                                               |
| <i>HNRNPK</i> | (NM_002140) 3-17 (1-465)                                                                                                                                                                     |                                                                                                                      |                                                                                                               |

|                   |                                                                                                                                                                                                                                          |                                                                                                                                 |                                               |
|-------------------|------------------------------------------------------------------------------------------------------------------------------------------------------------------------------------------------------------------------------------------|---------------------------------------------------------------------------------------------------------------------------------|-----------------------------------------------|
| <i>HNF1A</i>      |                                                                                                                                                                                                                                          | (NM_000545): 3 (205-238), 4 (271-314)                                                                                           |                                               |
| <i>HRAS</i>       | (NM_005343) 2-3 (1-59), 3-4 (87-135), 4 (137-150)                                                                                                                                                                                        | (NM_005343): 2 (1-15), 3 (38-63)                                                                                                | (NM_005343): 2-5 (1-190)                      |
| <i>IDH1</i>       | (NM_005896) 4 (132-133)                                                                                                                                                                                                                  | (NM_005896): 3-10 (1-415)                                                                                                       | (NM_005896): 3-10 (1-415)                     |
| <i>IDH2</i>       | NM_002168) 4 (125-178)                                                                                                                                                                                                                   | (NM_002168): 4 (125-178)                                                                                                        | (NM_002168): 1 (1-14), 1-11 (26-453)          |
| <i>IKZF2</i>      | (NM_006060) 2-8 (1-377), 8 (383-392), 8 (403-430), 8 (445), 8 (481-493)                                                                                                                                                                  |                                                                                                                                 | (NM_016260): 2-8 (1-527)                      |
| <i>IL2RG</i>      | (NM_000206) 1-2 (1-45), 2-4 (51-195), 5-8 (199-339)                                                                                                                                                                                      |                                                                                                                                 |                                               |
| <i>IL7R</i>       | (NM_002185) 5-7 (180-292)                                                                                                                                                                                                                |                                                                                                                                 |                                               |
| <i>JAK1</i>       | (NM_002227) 3-9 (3-445), 10 (447-465), 10-22 (470-1023), 22-24 (1026-1123)                                                                                                                                                               |                                                                                                                                 |                                               |
| <i>JAK2</i>       | (NM_004972) 10 (405-442), 12-14 (505-622), 16 (665-711), 18 (762-812)                                                                                                                                                                    | (NM_004972): 14 (615-622)                                                                                                       | (NM_004972): 3-18 (1-806), 19-25 (812-1133)   |
| <i>JAK3</i>       | (NM_000215) 2-6 (1-284), 7-13 (288-590), 14-23 (596-1069)                                                                                                                                                                                | (NM_000215): 13 (568-573), 16 (683-723)                                                                                         |                                               |
| <i>KDM6A</i>      | (NM_021140) 2-9 (54-223), 9-16 (228-631), 17-19 (642-971), 20-21 (980-1070), 22-29 (1080-1402)                                                                                                                                           |                                                                                                                                 |                                               |
| <i>KDR</i>        |                                                                                                                                                                                                                                          | (NM_002253): 6 (220-248), 7 (267-276), 11 (471-476), 19 (872-874), 21 (946-985), 26 (1135-1146), 27 (1171-1211), 30 (1308-1357) |                                               |
| <i>KIT</i>        | (NM_000222) 8-9 (411-514), 11 (550-592), 17 (788-828)                                                                                                                                                                                    | (NM_000222): 2 (51-93), 9-10 (502-547), 10-11 (540-592), 13 (641-664), 14 (670-712), 15 (714-745), 17 (815-828), 18 (838-866)   | (NM_000222): 1-6 (1-334), 6-21 (367-977)      |
| <i>KLHL6</i>      |                                                                                                                                                                                                                                          | (NM_130446): 1 (1-98)                                                                                                           |                                               |
| <i>KRAS</i>       | (NM_004985) 2-4 (1-150)                                                                                                                                                                                                                  | (NM_004985): 2 (1-22), 3 (38-63), 4 (103-147)                                                                                   | (NM_004985): 2-5 (1-189)                      |
| <i>MAP2K1</i>     | (NM_002755) 2 (27-90), 3 (98-146)                                                                                                                                                                                                        |                                                                                                                                 |                                               |
| <i>MDM2</i>       |                                                                                                                                                                                                                                          |                                                                                                                                 | (NM_002392): 1-11 (1-498)                     |
| <i>MET</i>        |                                                                                                                                                                                                                                          | (NM_001127500): 2 (168-209), 2 (375-400), 14 (1008-1028), 16 (1110-1132), 19 (1247-1284)                                        |                                               |
| <i>MLH1</i>       |                                                                                                                                                                                                                                          | (NM_000249): 12 (383-426)                                                                                                       |                                               |
| <i>MLL(KMT2A)</i> | (NM_005933) 2 (145-168), 3-4 (176-1075), 4 (1081-1112), 5 (1117-1184), 6 (1190-1212), 7 (1224-1325), 8-13 (1338-1560), 14-15 (1566-1665), 27 (2186-2195), 27 (2201-2355), 27 (2373-2452), 27 (2472-3215), 27 (3223-3324), 27 (3339-3575) |                                                                                                                                 | (NM_005933): 1-5 (103-1190), 6-36 (1207-3970) |
| <i>MPL</i>        | (NM_005373): 10 (490-522), 12 (552-636)                                                                                                                                                                                                  | (NM_005373): 10 (514-522)                                                                                                       | (NM_005373): 1-9 (1-488), 10-12 (490-636)     |
| <i>MYD88</i>      |                                                                                                                                                                                                                                          | (NM_002468): 1 (1-6), 1-5 (15-310)                                                                                              |                                               |
| <i>NF1</i>        | (NM_001042492) 2-5 (21-189), 6 (201-218), 8-13 (244-467), 13-17 (478-667), 18 (674-728), 18-22 (746-992), 23-24 (997-1066), 25-26 (1082-1146), 26-31 (1160-1378), 31-35 (1382-1549),                                                     |                                                                                                                                 |                                               |

|                |                                                                                                                                                                              |                                                                                                             |                                                                |
|----------------|------------------------------------------------------------------------------------------------------------------------------------------------------------------------------|-------------------------------------------------------------------------------------------------------------|----------------------------------------------------------------|
|                | 35-38 (1564-1868), 39 (1870-1884), 39-47 (1886-2322), 47-52 (2325-2555), 52-58 (2568-2840)                                                                                   |                                                                                                             |                                                                |
| <i>NOTCH1</i>  | (NM_017617) 26 (1529-1594), 26-28 (1602-1795), 34 (2550-2556), 34 (2290-2543), 34 (2069-2229), 34 (2234-2273), 34 (2550-2556), 34(2290-2543), 34 (2069-2229), 34 (2234-2273) | (NM_017617): 26 (1562-1601), 27 (1673-1679)                                                                 | (NM_017617): 2-31 (21-1893), 31-34 (1902-2286), 34 (2289-2552) |
| <i>NPM1</i>    | (NM_002520) 11 (283-295)                                                                                                                                                     | (NM_002520): 11 (283-295)                                                                                   | (NM_002520): 1-7 (1-181), 7-11 (187-295)                       |
| <i>NRAS</i>    | (NM_002524) 2-4 (1-150)                                                                                                                                                      | (NM_002524): 2 (1-18), 3 (38-62)                                                                            | (NM_002524): 2-5 (1-190)                                       |
| <i>PAX5</i>    | (NM_016734) 1-10 (14-392)                                                                                                                                                    |                                                                                                             |                                                                |
| <i>PDGFRA</i>  |                                                                                                                                                                              | (NM_006206): 12 (552-592), 14 (659-668), 15 (673-717), 18 (823-854)                                         |                                                                |
| <i>PHF6</i>    | (NM_032458) 2-3 (1-78), 4-10 (81-366)                                                                                                                                        |                                                                                                             |                                                                |
| <i>PIGA</i>    | (NM_002641) 2 (1-6), 2-5 (16-396), 6 (399-418), 6 (422-485)                                                                                                                  |                                                                                                             |                                                                |
| <i>PML</i>     | (NM_033238) 3 (201-255)                                                                                                                                                      |                                                                                                             |                                                                |
| <i>PRPF40B</i> | (NM_001031698) 2-19 (2-609), 19 (611-626), 20 (629-658), 20-26 (661-893)                                                                                                     |                                                                                                             |                                                                |
| <i>PIK3CA</i>  |                                                                                                                                                                              | (NM_006218): 2 (83-118), 5 (345-353), 8 (418-445), 10 (538-555), 14 (701-729), 21 (988-1069)                |                                                                |
| <i>PTPN11</i>  | (NM_002834) 3-4 (46-125), 7 (253-285), 12 (460-462), 12-13 (465-533)                                                                                                         | (NM_002834): 3 (59-104), 13 (501-533)                                                                       | (NM_002834): 1-4 (1-157), 5-15 (176-594)                       |
| <i>PTEN</i>    | (NM_000314) 7-8 (212-285), 8 (290-342)                                                                                                                                       | (NM_000314): 1 (5-27), 3 (67-70), 6 (170-210), 7 (212-266), 8 (287-342)                                     |                                                                |
| <i>RAD21</i>   | (NM_006265) 2-13 (1-560), 14 (569-632)                                                                                                                                       |                                                                                                             |                                                                |
| <i>RARA</i>    | (NM_000964) 6-7 (211-338)                                                                                                                                                    |                                                                                                             |                                                                |
| <i>RB1</i>     |                                                                                                                                                                              | (NM_000321): 4 (127-158), 6 (199-203), 11 (357-376), 18 (570-605), 20 (659-700), 21 (703-733), 22 (746-775) |                                                                |
| <i>RET</i>     |                                                                                                                                                                              | (NM_020975): 10-11 (610-667), 13 (766-798), 15 (880-910), 16 (918-934)                                      |                                                                |
| <i>RUNX1</i>   | (NM_001754) 2-4 (1-70), 4-9 (79-437)                                                                                                                                         |                                                                                                             | (NM_001754): 2-4 (1-70), 4-9 (73-437)                          |
| <i>SETBP1</i>  | (NM_015559) 4 (838-885)                                                                                                                                                      |                                                                                                             |                                                                |
| <i>SF1</i>     | (NM_004630) 2-12 (11-524), 13 (528-578), 13 (582-640)                                                                                                                        |                                                                                                             |                                                                |
| <i>SF3A1</i>   | (NM_005877) 1-7 (1-322), 7-9 (329-424), 9-12 (427-634), 13-16 (651-794)                                                                                                      |                                                                                                             |                                                                |
| <i>SF3B1</i>   | (NM_012433) 13-16 (574-790)                                                                                                                                                  |                                                                                                             |                                                                |
| <i>SH2B3</i>   | (NM_005475) 2 (1-39), 2 (43-99), 2 (132-150), 2 (158-164), 2-8 (212-576)                                                                                                     |                                                                                                             |                                                                |
| <i>SMC1A</i>   | (NM_006306) 1-5 (13-283), 6-7 (285-415), 8-14 (419-771), 15-19 (775-976), 20-22 (992-1146), 23-24                                                                            |                                                                                                             |                                                                |

|         |                                                                                                                                                                     |                                                                                                                        |                                                        |
|---------|---------------------------------------------------------------------------------------------------------------------------------------------------------------------|------------------------------------------------------------------------------------------------------------------------|--------------------------------------------------------|
|         | (1148-1206), 25 (1217-1234)                                                                                                                                         |                                                                                                                        |                                                        |
| SMC3    | (NM_005445) 1 (1-5), 2-6 (19-110), 6-16 (113-504), 16-17 (507-580), 17-25 (591-975), 25-29 (979-1217)                                                               |                                                                                                                        |                                                        |
| SRSF2   | (NM_003016) 1 (1-38), 1 (45-121)                                                                                                                                    |                                                                                                                        |                                                        |
| STAG1   | (NM_005862) 2 (1-5), 3-20 (10-703), 21-22 (718-738), 22-27 (740-953), 27-34 (955-1259)                                                                              |                                                                                                                        |                                                        |
| STAG2   | (NM_006603) 2-15 (1-512), 16 (521-534), 16-21 (541-711), 21-33 (714-1232)                                                                                           |                                                                                                                        |                                                        |
| STAT3   | (NM_139276) 17 (489-503), 18-22 (534-715)                                                                                                                           |                                                                                                                        |                                                        |
| SMAD4   |                                                                                                                                                                     | (NM_005359): 3 (119-142), 5 (167-208), 6 (243-263), 8 (310-319), 9 (329-373), 10 (385-424), 11 (443-480), 12 (496-535) |                                                        |
| SMARCB1 |                                                                                                                                                                     | (NM_003073): 2 (39-78), 4 (156-167), 5 (199-210)                                                                       |                                                        |
| STAT5A  | (NM_003152) 3-6 (1-177), 6-7 (181-206), 8-9 (266-286), 9-20 (315-795)                                                                                               |                                                                                                                        |                                                        |
| STAT5B  | (NM_012448) 16 (636-693)                                                                                                                                            |                                                                                                                        |                                                        |
| SMO     |                                                                                                                                                                     | (NM_005631): 3 (197-242), 5 (323-366), 6 (403-422), 9 (533-551)                                                        |                                                        |
| SUZ12   | (NM_015355) 1 (20-44), 1 (46-84), 2 (92-107), 4-5 (129-169), 7-16 (198-740)                                                                                         |                                                                                                                        |                                                        |
| SRC     |                                                                                                                                                                     | (NM_005417): 14 (530-537)                                                                                              |                                                        |
| STK11   |                                                                                                                                                                     | (NM_000455): (36-77), 4-5 (193-211), 6 (261-288), 8 (332-370)                                                          |                                                        |
| TET2    | (NM_001127208) 3 (1-77), 3 (91-826), 3 (829-853), 3-11 (867-2003)<br>(NM_000546) 2 (1-25), 4 (80-125), 5-11 (134-394)                                               |                                                                                                                        | (NM_001127208): 3 (1-854), 3-11 (866-2003)             |
| TP53    | (NM_000546) 2 (1-25), 4 (80-125), 5 (134-187), 6-11 (190-394)                                                                                                       | (NM_000546): 2 (1-12), 4 (69-112), 5 (126-186), 5-6 (181-192), 6 (187-223), 6-7 (214-253), 8 (267-306), 10 (332-342)   | (NM_000546): 2-11 (1-394)                              |
| TERC    | 81 gene panel                                                                                                                                                       |                                                                                                                        |                                                        |
| TERT    | (NM_198253) 1 (1-24), 2 (349-525), 2 (80-164), 2 (258-342), 3-4 (525-630), 4-5 (633-663), 5 (675-677), 6 (711-749), 6-8 (753-800), 8-11 (805-925), 11-16 (933-1133) |                                                                                                                        |                                                        |
| U2AF1   | (NM_006758) 2 (15-44), 6 (117-161)                                                                                                                                  |                                                                                                                        |                                                        |
| U2AF2   | (NM_007279) 1 (1-17), 3-5 (62-161), 6-12 (163-437), 12 (441-473)                                                                                                    |                                                                                                                        |                                                        |
| VHL     |                                                                                                                                                                     | (NM_000551): (88-114), 2 (129-155), 3 (157-200)                                                                        |                                                        |
| WT1     | (NM_024426) 1 (187-216), 1 (179-184), 1 (2-44), 1 (122-165), 2-10 (216-518)                                                                                         |                                                                                                                        | (NM_024426): 1 (1-59, 72-105, 122-216), 2-10 (216-518) |
| XPO1    |                                                                                                                                                                     | (NM_003400) 14-15 (501-575)                                                                                            |                                                        |

ZRSR2 (NM\_005089) 1-3 (1-68), 4 (71-90), 6-8 (134-201), 8 (212-257), 10-11 (276-417), 11 (476-483)

**Supplemental Table 2: Baseline characteristics of relapsed/refractory adult AML with *KMT2Ar*.**

| Characteristic                                      | <i>KMT2Ar</i> | Age-matched diploid | <i>P</i> |
|-----------------------------------------------------|---------------|---------------------|----------|
| <b>Patients, no.</b>                                | 50            | 177                 |          |
| <b>Median age, years (range)</b>                    | 47 (22-75)    | 54 (10-85)          | 0.07     |
| <b>Female, no. (%)</b>                              | 28 (56)       | 79 (45)             | 0.2      |
| <b>Monocytic phenotype, no. (%)</b>                 | 15 (30)       | 44 (25)             | 0.5      |
| <b>WBC, median x 10<sup>9</sup>/L (range)</b>       | 4.3 (0-135)   | 8 (0-250)           | 0.03     |
| <b>Platelets, median x 10<sup>9</sup>/L (range)</b> | 54 (7-358)    | 56 (1-497)          | 0.8      |
| <b>BM blast %, median (range)</b>                   | 51 (0-94)     | 48 (15-96)          | 0.4      |
| <b>High intensity treatment, no. (%)</b>            | 46 (92)       | 138 (78)            | 0.03     |
| <b>Low intensity treatment, no. (%)</b>             | 4 (8)         | 39 (22)             |          |
| <b>Allo-HSCT, no. (%)</b>                           | 18 (36)       | 34 (19)             | 0.02     |

High intensity treatment includes treatment with the combination of cytarabine and idarubicin or the addition of a nucleoside analog to the combination. Low intensity treatment includes treatment with hypomethylating agents, low-dose cytarabine, or targeted therapies.

WBC, white blood cell; BM, bone marrow; LDH, lactate dehydrogenase; Allo-HSCT, allogeneic hematopoietic stem cell transplant; t-aml; therapy related AML.

*P*: Kruskal-Wallis or Fisher exact test.



**Supplemental Table 3: Karyotype of 10 patients with less common *KMT2A* rearrangements who constitute the “Other” group in relapse/refractory cohort.**

| Age and Sex | Karyotype                                                                                            |
|-------------|------------------------------------------------------------------------------------------------------|
| 31/F        | (12)46XX,3q-,t(11q;15q);(9)45-46",+other changes;(4)+6                                               |
| 43/F        | "47,XX,t(3;7)(p21;p22),t(4;10;15)(q21;p13;q15),+6,add(6)(q21),del(9)(q13q22),t(11;22)(q23;q11.2)[13] |
| 58/F        | 45,XX,t(5;11)(q35;q23),-10,ider(17)(q10)del(17)(q11.2q21)[11];<br>46,XX[9]                           |
| 75/M        | 47,XY,t(3;11)(q12;q23),+8[2]; 47,idem,del(2)(q33)[18]                                                |
| 50/F        | 46,XX,t(8;11)(q13;p12)[1];46,XX[19]                                                                  |
| 5 patients  | Unknown karyotype                                                                                    |

**Supplemental Table 4: Treatments for newly diagnosed *KMT2Ar* AML patients.**

| <b>Treatment regimen</b>            | <b>N (%)</b>    |
|-------------------------------------|-----------------|
| <b>High intensity</b>               | <b>145 (84)</b> |
| <i>IA (Idarubicin + Cytarabine)</i> | 60 (41)         |
| <i>CLIA (Cladribine + IA)</i>       | 9 (6)           |
| <i>FIA (Fludarabine + IA)</i>       | 11 (8)          |
| <i>CIA (Clofarabine + IA)</i>       | 17 (12)         |
| <i>FLAG-Ida + venetoclax</i>        | 2 (1)           |
| <i>CLIA + venetoclax</i>            | 3 (2)           |
| <i>Other</i>                        | 43 (30)         |
| <b>Low intensity</b>                | <b>27 (16)</b>  |
| <i>LDAC</i>                         | 2 (7)           |
| <i>HMA</i>                          | 9 (33)          |
| <i>HMA + venetoclax</i>             | 5 (19)          |
| <i>Other</i>                        | 11 (41)         |

LDAC, low-dose cytarabine; HMA, hypomethylating agents.

Midostaurin was added to therapy in 3 of 14 patients with *KMT2Ar* and *FLT3* mutations.

Other treatments include investigational agents as single agents or in combinations with high intensity chemotherapy or less commonly used regimens.

**Supplemental Table 5: Karyotype of 17 patients with less common *KMT2A* rearrangements who constitute the “Other” group.**

| Age and Sex | Karyotype                                              |
|-------------|--------------------------------------------------------|
| 27/M        | (25)46XY,t(11q-;17q+)(q23;q25)                         |
| 31/M        | (17)46XY,t(10p-;11q+);(7)46XY,1p+,t(10p-;11q+);(1)46XY |
| 51/F        | (19)47XX,t(7;11)(q11.2;q23),+8;(2)DIP                  |
| 21/M        | t(x;11)(q22;q23)                                       |
| 48/F        | 47,XY,t(3;11)(q12;q23),+8[2]; 47,idem,del(2)(q33)[18]  |
| 51/F        | t(11;22)(q23;q12)                                      |
| 40/F        | 46XX,DER(2)t(2;11)(q31;q23)[20]                        |
| 73/M        | t(1;11)(p32;q23)                                       |
| 54/F        | t(11;17)(q23;q25)                                      |
| 64/F        | t(2;11)(p21;q23),                                      |
| 31/F        | t(7;11)(q32;q23)                                       |
| 50/F        | t(1;11)(p34;q13),                                      |
| 70/M        | t(11;16)(q23;p13.3),                                   |
| 32/M        | t(11;17)(q23;q12),                                     |
| 50/M        | t(11;17)(q23;q25)                                      |
| 71/M        | t(11;15)(q23;q14),                                     |
| 55/M        | t(11;17)(q23;q12),                                     |

**Supplemental Table 6: Baseline characteristics of newly diagnosed *KMT2Ar* AML by subgroups.**

| Characteristic                                 | t(9;11)    | t(6;11)    | <i>P</i> | t(11;19)    | <i>P</i>     | t(11;v)(q23;v) | <i>P</i>     |
|------------------------------------------------|------------|------------|----------|-------------|--------------|----------------|--------------|
| Patients, no.                                  | 97         | 19         |          | 34          |              | 22             |              |
| Median age, years (range)                      | 52 (17-82) | 54 (22-85) | 0.8      | 52 (23-83)  | 0.7          | 52 (20-73)     | 0.9          |
| Female, no. (%)                                | 65 (67)    | 11 (58)    | 0.4      | 18 (53)     | 0.2          | 10 (45)        | 0.09         |
| Monocytic phenotype, no. (%)                   | 73 (75)    | 14 (74)    | 0.9      | 19 (56)     | <b>0.048</b> | 10 (45)        | <b>0.009</b> |
| WBC, median x 10 <sup>9</sup> /L (range)       | 9 (1-270)  | 9 (1-134)  | 0.9      | 9 (1-111)   | 0.9          | 9 (1-106)      | 0.9          |
| Platelets, median x 10 <sup>9</sup> /L (range) | 48 (4-235) | 49 (9-155) | 0.9      | 49 (10-187) | 0.9          | 49 (3-279)     | 0.9          |
| BM blast %, median (range)                     | 76 (20-98) | 76 (22-94) | 0.9      | 75 (22-92)  | 0.9          | 76 (21-94)     | 0.9          |
| t-AML, no. (%)                                 | 47 (48)    | 5 (26)     | 0.08     | 10 (29)     | 0.07         | 7 (32)         | 0.2          |
| High intensity treatment, no. (%)              | 82 (85)    | 17 (89)    | 0.7      | 26 (76)     | 0.3          | 20 (91)        | 0.7          |
| Low intensity treatment, no. (%)               | 15 (15)    | 2 (11)     |          | 8 (24)      |              | 2 (9)          |              |
| Allo-HSCT, no. (%)                             | 26 (27)    | 8 (42)     | 0.3      | 7 (21)      | 0.6          | 5 (23)         | 0.8          |

High intensity treatment includes treatment with the combination of cytarabine and idarubicin or the addition of a nucleoside analog to the combination. Low intensity treatment includes treatment with hypomethylating agents, low-dose cytarabine, or targeted therapies.  
WBC, white blood cell; BM, bone marrow; LDH, lactate dehydrogenase; Allo-HSCT, allogeneic hematopoietic stem cell transplant; t-aml; therapy related AML.  
*P*: Kruskal-Wallis or Fisher exact test.

**Supplemental Table 7: Frequency of mutations by 11q23 translocation.**

|                | <b>t(9;11)</b> | <b>t(6;11)</b> | <b>P</b> | <b>t(11;19)</b> | <b>P</b> | <b>t(11;v)(q23;v)</b> | <b>P</b> |
|----------------|----------------|----------------|----------|-----------------|----------|-----------------------|----------|
| <b>RAS</b>     | 16/52 (31)     | 5/15 (33)      | 0.9      | 7/21 (33)       | 0.9      | 1/15 (7)              | 0.09     |
| <b>FLT3</b>    | 8/55 (15)      | 3/16 (19)      | 0.7      | 2/22 (9)        | 0.7      | 1/17 (6)              | 0.7      |
| <b>PTPN11</b>  | 1/20 (5)       | 0/3 (0)        | 0.9      | 1/9 (11)        | 0.5      | 0/7 (0)               | 0.9      |
| <b>TP53</b>    | 0/22 (0)       | 1/5 (20)       | 0.2      | 0/9 (0)         | 0.9      | 1/7 (14)              | 0.2      |
| <b>CEBPA</b>   | 1/29 (3)       | 0/7 (0)        | 0.9      | 1/13 (8)        | 0.5      | 0/8 (0)               | 0.9      |
| <b>IDH 1/2</b> | 2/30 (7)       | 0/10 (0)       | 0.9      | 0/14 (0)        | 0.9      | 0/8 (0)               | 0.9      |
| <b>WT1</b>     | 0/17 (0)       | 0/2 (0)        | 0.9      | 1/14 (7)        | 0.5      | 0/4 (0)               | 0.9      |

Values are mutated/tested (%). Subgroups were compared to t(9;11).

**Supplemental Table 8: Responses of newly diagnosed *KMT2Ar* AML by subgroups.**

| <b>Best Response</b>       | <b>t(9;11)</b> | <b>t(6;11)</b> | <b>P</b> | <b>t(11;19)</b> | <b>P</b> | <b>t(11;v)(q23;v)</b> | <b>P</b> |
|----------------------------|----------------|----------------|----------|-----------------|----------|-----------------------|----------|
| <b>N</b>                   | 97             | 19             |          | 34              |          | 22                    |          |
| <b>CR</b>                  | 63 (65)        | 11 (58)        | 0.9      | 23 (68)         | 0.7      | 16 (73)               | 0.1      |
| <b>CRi</b>                 | 3 (3)          | 2 (11)         |          | 2 (6)           |          | 3 (14)                |          |
| <b>CR+CRi</b>              | 66 (68)        | 13 (68)        |          | 25 (74)         |          | 19 (86)               |          |
| <b>No response</b>         | 31 (32)        | 6 (32)         |          | 9 (27)          |          | 3 (14)                |          |
| <b>MRD negative by MFC</b> | 10/11 (91)     | 1/2 (50)       | 0.3      | 3/7 (43)        | 0.047    | 3/5 (60)              | 0.2      |

Values are n (%).

CR, complete remission; CRi, complete remission with incomplete hematologic recovery; MRD, minimal residual disease assessed by multiparameter flow cytometry (MFC) following induction in evaluable patients.

P: Kruskal-Wallis or Fisher exact test. All subgroups were compared to t(9;11).

**Supplemental Table 9: Responses by lines of therapy for adults with AML.**

|                            | 1 <sup>st</sup> Line |             |          | 2 <sup>nd</sup> Line |            |          | ≥ 3 <sup>rd</sup> Line |          |          |
|----------------------------|----------------------|-------------|----------|----------------------|------------|----------|------------------------|----------|----------|
|                            | <i>KMT2Ar</i>        | Diploid     | <i>P</i> | <i>KMT2Ar</i>        | Diploid    | <i>P</i> | <i>KMT2Ar</i>          | Diploid  | <i>P</i> |
| <b>N</b>                   | 172                  | 522         |          | 91                   | 178        |          | 217                    | 112      |          |
| <b>CR</b>                  | 113 (66)             | 403 (77)    | 0.01     | 31 (34)              | 61 (34)    | 0.8      | 11 (5)                 | 17 (15)  | < 0.001  |
| <b>CRi</b>                 | 10 (6)               | 18 (4)      |          | 8 (9)                | 19 (11)    |          | 9 (4)                  | 18 (16)  |          |
| <b>CR+CRi</b>              | 123 (72)             | 421 (81)    |          | 39 (43)              | 80 (45)    |          | 20 (9)                 | 35 (31)  |          |
| <b>No response</b>         | 49 (28)              | 101 (19)    |          | 52 (57)              | 98 (55)    |          | 197 (91)               | 77 (69)  |          |
| <b>MRD negative by MFC</b> | 17/25 (68)           | 90/132 (68) | 0.9      | 12/16 (75)           | 16/24 (67) | 0.7      | 1/3 (33)               | 8/9 (89) | 0.1      |

Values are n (%).

CR, complete remission; CRi, complete remission with incomplete hematologic recovery; MRD, minimal residual disease assessed by multiparameter flow cytometry (MFC) following induction in evaluable patients.

**Supplemental Table 10: Variables associated with CNS disease in adults with KMT2Ar AML.**

| <b>Variables</b>                                    | <b>CNS +</b> | <b>CNS-</b> | <b>P</b> |
|-----------------------------------------------------|--------------|-------------|----------|
| <b>Patients, no. (%)</b>                            | 20 (12)      | 152 (88)    |          |
| <b>WBC, median x 10<sup>9</sup>/L (range)</b>       | 8.5 (1-108)  | 9.1 (1-270) | 0.9      |
| <b>Platelets, median x 10<sup>9</sup>/L (range)</b> | 49 (21-155)  | 48 (3-279)  | 0.9      |
| <b>BM blast %, median (range)</b>                   | 76 (38-94)   | 76 (20-98)  | 0.9      |
| <b>t-AML, no. (%)</b>                               | 5 (25)       | 64 (42)     | 0.2      |
| <b>RAS, no. (%)</b>                                 | 5/18 (28)    | 24/85 (28)  | 0.9      |
| <b>FLT3, no. (%)</b>                                | 4/18 (22)    | 10/92 (11)  | 0.2      |
| <b>TP53, no. (%)</b>                                | 0/6 (0)      | 2/37 (5)    | 0.9      |
| <b>≥1 mutations, no. (%)</b>                        | 8/18 (44)    | 44/99 (44)  | 0.9      |
| <b>≥2 mutations, no. (%)</b>                        | 1/18 (6)     | 7/99 (7)    | 0.9      |
| <b>t(9;11), no. (%)</b>                             | 8 (40)       | 89 (59)     | 0.2      |
| <b>t(6;11), no. (%)</b>                             | 3 (15)       | 16 (11)     | 0.5      |
| <b>t(11;19), no. (%)</b>                            | 5 (24)       | 29 (19)     | 0.6      |
| <b>t(11;v)(q23;v), no. (%)</b>                      | 5 (25)       | 29 (19)     | 0.6      |
| <b>Extra-medullary disease, no. (%)</b>             | 7 (35)       | 54 (36)     | 0.9      |
| <b>Monocytic phenotype, no. (%)</b>                 | 14 (70)      | 102 (67)    | 0.9      |

Values are n (%).

WBC white blood cell; BM, bone marrow; LDH, lactate dehydrogenase; t-aml; therapy related AML; values indicate mutated/tested genes. Extramedullary disease at diagnosis.

P: Kruskal-Wallis or Fisher exact test.
